# Supplementary material for: A Symbiotic Fungus Sistotrema Benefits Blueberry Rejuvenation and Abiotic Stress Tolerance
Source: MDPI journal article supplement (doi:10.3390/jof9070779), 2023-07-24
Supplement: s1 [file s1]

**Table S1** Constituents of 10 × Hoagland's nutrient solution for soil

| Composition                                           | Concentration (g/L) |
|-------------------------------------------------------|---------------------|
| Ca (NO <sub>3</sub> ) <sub>2</sub> ·4H <sub>2</sub> O | 9.45                |
| KNO <sub>3</sub>                                      | 5.06                |
| NH <sub>4</sub> NO <sub>3</sub>                       | 0.80                |
| KH <sub>2</sub> PO <sub>4</sub>                       | 1.36                |
| MgSO <sub>4</sub>                                     | 4.93                |
| FeSO <sub>4</sub> ·7H <sub>2</sub> O                  | 5.56                |
| EDTA-2Na                                              | 7.46                |

**Table S2** Sequences of primers used to amplify ITS1 sequences

| Primer name | Sequences (5'→3')    | Gene length |
|-------------|----------------------|-------------|
| ITS1        |                      |             |
| ITS1F       | TCCGTAGGTGAACCTGCGG  | 388-583 bp  |
| ITS2R       | TCCTCCGCTTATTGATATGC |             |

**Table S3** Primers for PCR screening of re-inoculation fungi

| Primer name | Sequences (5'→3') | Gene length |
|-------------|-------------------|-------------|
| Ag-Ca F     | CAACTTTTAACAACG   | 150-200 bp  |
| Ag-Ca R     | CACTCGAACAGGCGT   |             |

**Table S4** Constituents of DNS reaction solution

| composition | Concentration(g/L) |
|-------------|--------------------|
| DNS         | 6.50               |
| NaOH        | 26.00              |
| Glycerol    | 45.00              |

**Table S5** The 30 symbiotic fungi in the blue community

| Number | Name                                                                           |
|--------|--------------------------------------------------------------------------------|
| 1      | o_Cantharellales; f_Cantharellales_fam_Incertae_sedis; g_ <i>Sistotrema</i>    |
| 2      | o_Helotiales; g_ <i>Spirosphaera</i>                                           |
| 3      | g_ <i>Calcarisporiella</i>                                                     |
| 4      | o_Pleosporales; f_Didymellaceae; g_ <i>Boeremia</i>                            |
| 5      | o_Moniliales; f_Dematiaceae; g_ <i>Coniosporium</i>                            |
| 6      | o_Orbiliales; g_ <i>Microdochium</i>                                           |
| 7      | o_Saccharomycetales; g_ <i>Candida</i>                                         |
| 8      | o_Hypocreales; f_Clavicipitaceae; g_ <i>Pochonia</i>                           |
| 9      | o_Pleosporales; f_Cucurbitariaceae; g_ <i>Pyrenochaetopsis</i>                 |
| 10     | o_Pezizales; f_Ascobolaceae; g_ <i>Ascobolus</i>                               |
| 11     | o_Teloschistales; f_Teloschistaceae; g_ <i>Athallia</i>                        |
| 12     | o_Sordariales; f_Chaetomiaceae; g_ <i>Corynascella</i>                         |
| 13     | o_Pleosporales; f_Latoruaceae; g_ <i>Latorua</i>                               |
| 14     | o_Eurotiales; f_Trichocomaceae; g_ <i>Sagenomella</i>                          |
| 15     | f_Orbiliaceae; g_ <i>Dactylella</i>                                            |
| 16     | g_ <i>Guehomyces</i>                                                           |
| 17     | f_Orbiliaceae; g_ <i>Duddingtonia</i>                                          |
| 18     | o_Archaeorhizomycetales; f_Archaeorhizomycetaceae; g_ <i>Archaeorhizomyces</i> |
| 19     | o_Tremellales; f_Trimorphomycetaceae; g_ <i>Saitozyma</i>                      |
| 20     | o_Pleosporales; f_Tetraplosphaeriaceae; g_ <i>Tetraplosphaeria</i>             |
| 21     | o_Cystobasidiales; f_Microsporomycetaceae; g_ <i>Microsporomyces</i>           |
| 22     | o_Agaricales; f_Strophariaceae; g_ <i>Deconica</i>                             |
| 23     | o_Malasseziales; f_Malasseziaceae; g_ <i>Malassezia</i>                        |
| 24     | o_Russulales; f_Stephanosporaceae; g_ <i>Unidentified</i>                      |
| 25     | o_Cantharellales; f_Ceratobasidiaceae; g_ <i>Unidentified</i>                  |
| 26     | o_Hymenoptera; f_Orbiliaceae; g_ <i>Unidentified</i>                           |
| 27     | o_Sordariales; f_Chaetomiaceae; g_ <i>Unidentified</i>                         |
| 28     | o_Hypocreales; f_Clavicipitaceae; g_ <i>Unidentified</i>                       |
| 29     | o_Pezizales; f_Pyronemataceae; g_ <i>Unidentified</i>                          |
| 30     | o_Pleosporales; f_Unidentified; g_ <i>Unidentified</i>                         |
